# Supplementary material for: Identification of Inverse Regulator-a (Inr-a) as Synonymous with Pre-mRNA Cleavage Complex II Protein (Pcf11) in Drosophila
Source: PubMed Central journal article supplement (PMC3362299; doi:10.1534/g3.112.002071), 2012-06-01
Supplement: supp_2.6.701_FigureS1.pdf [file supp_2.6.701_FigureS1.pdf]

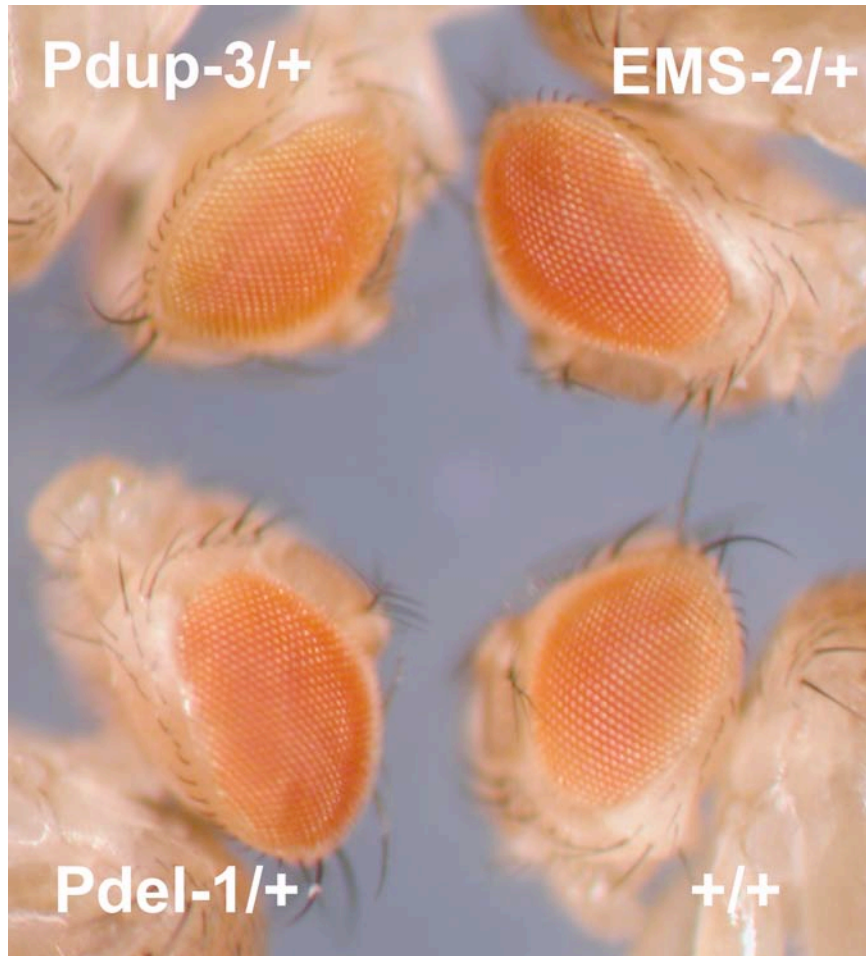

**Figure S1** The eye color phenotypes of the *Pcfl1* deletion and duplication mutants indicate dosage effects on a point mutation allele of *white*. The genotypes of the eyes are briefly indicated and “EMS-2” denotes “*Inr-a*<sup>EMS-2</sup>”. All the eyes are from males and the *w* allele *apricot-2* (*w*<sup>o2</sup>) was used. Pdel-1 has a similar phenotype as EMS-2, with eye color slightly increased compared to the normal control in the same image. Pdup-3 reduces eye color slightly.
